# Supplementary material
Source: publisher site journal article supplement (https://www.degruyterbrill.com/publication/isbn/9783050049663/downloadAsset/9783050049663_Buchinformation.pdf)
Supplement: Supplementary file 1 [file 9783050049663_Buchinformation.pdf]

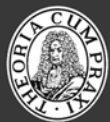

# Akademie Verlag

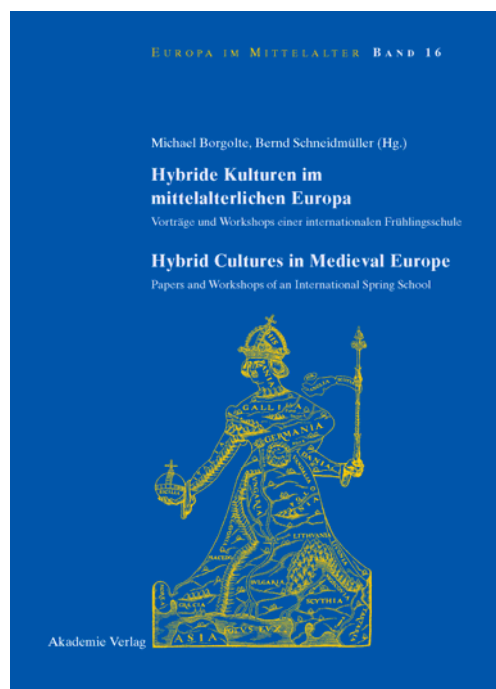

## Hybride Kulturen im mittelalterlichen Europa / *Hybride Cultures in Medieval Europe*

Vorträge und Workshops einer Frühlings-  
schule / *Papers and Workshops of an  
International Spring School*

Herausgegeben von Michael Borgolte  
und Bernd Schneidmüller

*Europa im Mittelalter. Abhandlungen und Beiträge  
zur historischen Komparatistik, Band 16*

2010. 342 S. – 50 Abb. – 170 x 240 mm,

Festeinband, € 69,80

ISBN 978-3-05-004695-2

Kulturen sind keine monolithischen Blöcke. Sie sind hybrid, setzen sich also aus Elementen verschiedenster Herkunft zusammen und bringen aus ihnen Neues hervor. Das DFG-Schwerpunktprogramm „Integration und Desintegration der Kulturen im europäischen Mittelalter“ hat sich zum Ziel gesetzt, die Geschichte Europas im Mittelalter vom permanenten Kontakt und Austausch her zu denken und die sich daraus ergebenden Prozesse kultureller Innovationen zu analysieren.

Auf einer „International Spring School“ im April 2008 präsentierte sich das Schwerpunktprogramm einer breiten wissenschaftlichen Öffentlichkeit. Der Band vereint die dort gehaltenen Vorträge und Workshops. Das Phänomen der Hybridität von Kulturen und die Differenzen der mittelalterlichen Welt zwischen Island und der Levante, zwischen Skandinavien und Nordafrika werden aus den Blickwinkeln verschiedener Disziplinen (Byzantinistik, Skandinavistik, Mediävistik, Germanistik, Kunstgeschichte, Orientalistik, Judaistik, Osteuropäische Geschichte) und Wissenschaftsnationen (Ungarn, Italien, Niederlande, Russland, Frankreich, Israel, Griechenland, USA, Island, Deutschland) beleuchtet.
